# Supplementary material for: Two H3K23 histone methyltransferases, SET-32 and SET-21, function synergistically to promote nuclear RNAi-mediated transgenerational epigenetic inheritance in Caenorhabditis elegans
Source: PubMed Central journal article supplement — bioRxiv. 2024 Nov 6:2024.11.05.622152. Preprint. [Version 2] doi: 10.1101/2024.11.05.622152 (PMC11580914; doi:10.1101/2024.11.05.622152), 2024-11-06

615  
616  
617  
618  
619  
620  
621  
622  
623  
624  
625  
626  
627  
628  
629  
630  
631  
632  
633  
634  
635  
636  
637  
638  
639  
640  
641  
642  
643  
644  
645  
646  
647  
648  
649  
650

651 **Figure S1.** (A) Pairwise alignment of SET-21 and SET-32 proteins. Motifs I-IV of the SET domain, pre-  
652 SET zinc cluster, and post-SET zinc center were highlighted. The SET domain was marked by vertical  
653 lines. (B) Genome browser shots of *set-21* and *set-32* genes. (C-D) Tissue-specific and developmental

654 mRNA expression profiles for *set-21*, *set-32*, *set-25*, and *met-2* using data generated by<sup>41,42</sup>. Plots were  
655 generated by <https://ahringerlab.com/RegAtlas/>.

656

657 **Figure S2. SET-21 and SET-32 are expressed in embryo.** Anti-FLAG immunofluorescent microscopy  
658 was performed for different stages of N2, *set-21*(native)::3xFLAG, *set-32*(native)::3xFLAG embryos.  
659 Representative IF images were showed for each strain, together with DAPI and DIC images of the same  
660 embryo. Scale bar: 10 $\mu$ m.

661

662 **Figure S3. *set-32*;*set-21* mutant animals show germline defects at 25°C.** (A-B) Multigenerational  
663 brood size analysis. Worms were maintained at 20°C before shifting to 25°C for F1 and the subsequent  
664 generations. Strains: WT (N2), *set-32*(*red11*), *set-21*(*ok2320*), and *set-32*(*red11*);*set-21*(*ok2320*) mutant  
665 animals in (A) and WT (N2), *set-21*(*red109*), and *set-32*(*red11*);*set-21*(*red109*) in (B). We note that the  
666 smaller brood size of *set-21*(*ok2320*) compared to *set-21*(*red109*) or *set-32*;*set-21*(*ok2320*) is likely due  
667 to some unknown background mutations. (C) Oocytes and sperm of *set-32*(*red11*);*set-21*(*red109*) young  
668 adults (F7 at 25°C) were examined by DAPI staining. Percentages of adult animals with both oocytes  
669 and sperm, only either oocyte or sperm, and neither gamete were indicated with representative DAPI-  
670 staining images.

671

672 **Figure S4. Whole-genome coverage plots of H3K23me1, me2, and me3 comparing WT versus *set-***  
673 ***21*, *set-32*, or *set-32*;*set-21* mutant.** The coverage, averaged from two replicates, was normalized to the  
674 ChIP input signal and was calculated for each 10kb window.

675

676 **Figure S5.** (A) A scatter plot of whole-genome comparison of H3K9me3 and H3K23me3 levels (1 kb  
677 windows) in the WT animals. (B) A Venn diagram of HRDE-1-dependent H3K23me3 and MET-2 SET-  
678 25-dependent H3K23me3. (C) A Venn diagram of HRDE-1-dependent H3K9me3 and MET-2 SET-25-  
679 dependent H3K9me3.

680

681 **Figure S6. RNA-seq (A-C) and sRNA-seq (D-E) comparison of WT and *set-32* or *set-21* single**  
682 **mutant.**

683

684 **Figure S7.** MA-plots comparing *hrde-1* and WT animals for (A) mRNA and (B) siRNA expressions of  
685 all protein-coding genes.

686

687 **Figure S8.** Venn diagram of genes with decreased or increased siRNA expression (minimal 3-fold  
688 change, FDR  $\leq$  0.02) comparing *set-21* or *set-32* single mutant with *set-32*;*set-21* double mutant.

689

690 **Figure S9. *set-32*;*set-21* mutations cause more wide spread changes in siRNA expression than**  
691 **changes in mRNA expressions.** (A) sRNA MA-plot comparing *set-32*;*set-21* and WT with *set-32*/*21*-  
692 sensitive genes (based on mRNA-seq) highlighted. (B-C) mRNA MA-plots comparing *set-32*;*set-21* and

693 WT with genes that had increased (B) and decreased (C) siRNA expression in the *set-32;set-21*  
694 compared to WT highlighted.

695

696 **Figure S10. For genes of which mRNAs are desilenced in *set-32;set-21*, as well as genes of which**  
697 **siRNAs are differentially expressed in *set-32;set-21* (either decreased or increased), their siRNAs**  
698 **tend to be bound by HRDE-1, instead of CSR-1.** The same CSR-1 vs HRDE-1-coIP sRNA MA-plot  
699 was shown in all three panels with each highlighting a different set of genes (marked in blue): (A)  
700 desilenced genes (mRNA-seq) in *set-32;set-21*, (B-C) genes with decreased (B) or increased (C) siRNA  
701 expression in the *set-32;set-21* mutant. CSR-1 vs HRDE-1-coIP sRNA data were from <sup>50</sup>. Genes with a  
702 minimal of 3-fold difference in CSR-1-vs-HRDE-1-coIP siRNA (FDR≤0.02) were highlighted in red.

703

704 Table 1. A list of H3K23me3-enriched regions in WT identified in WT adult animals, with H3K23me3  
705 ChIP-seq differential analysis outputs (log<sub>2</sub> ratio, FDR and mean) for WT vs *hrde-1* and WT vs *set-*  
706 *32;set-21* comparisons calculated by BaySeq.

707

708 Table 2. Protein-coding gene differential analysis results of H3K23me3 ChIP-seq, Pol II ChIP-seq,  
709 RNA-seq, and sRNA-seq for the comparisons between WT and various mutant animals. *Set-32/21-*  
710 sensitive genes, based on RNA-seq analysis, were indicated.

711

712 Table 3. A list of high-throughput sequencing libraries used in this study.

Figure S1

**A** pairwise alignment of SET-21 and SET-32

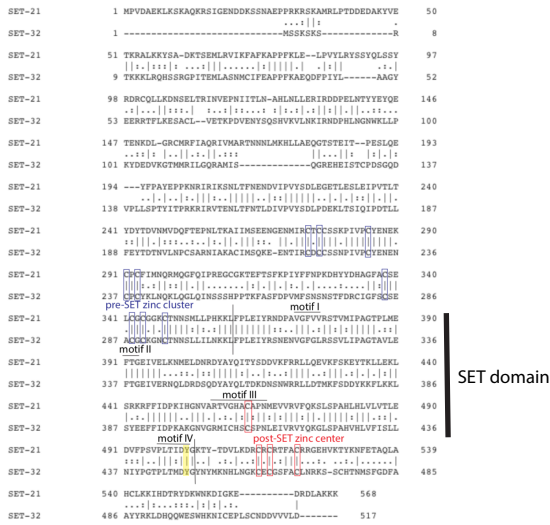

**B**

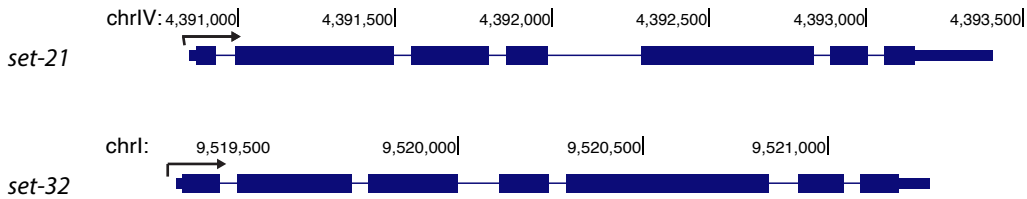

**C**

tissue-specific mRNA expression

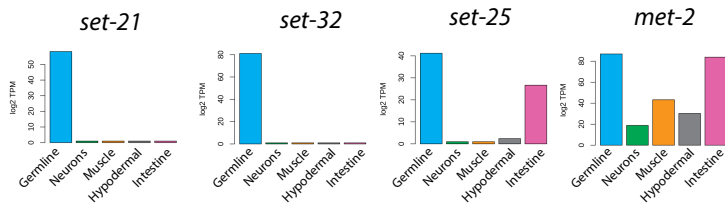

**D**

developmental mRNA expression

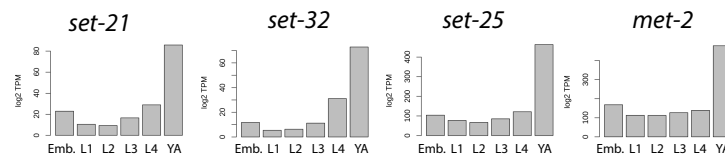

Plots were generated by <https://ahringerlab.com/RegAtlas/>

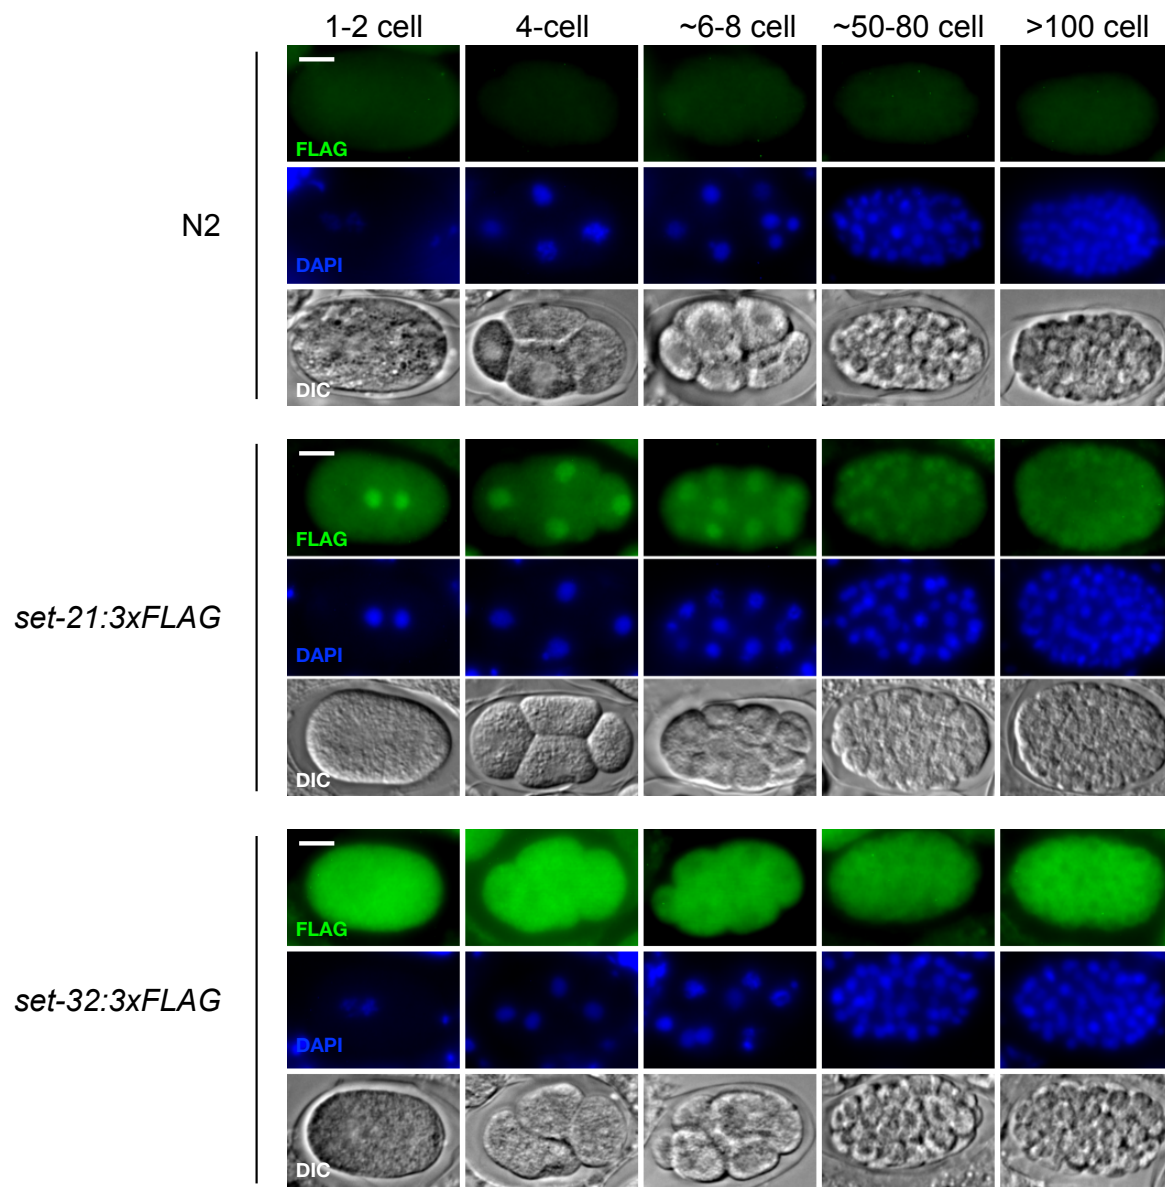

Figure S3

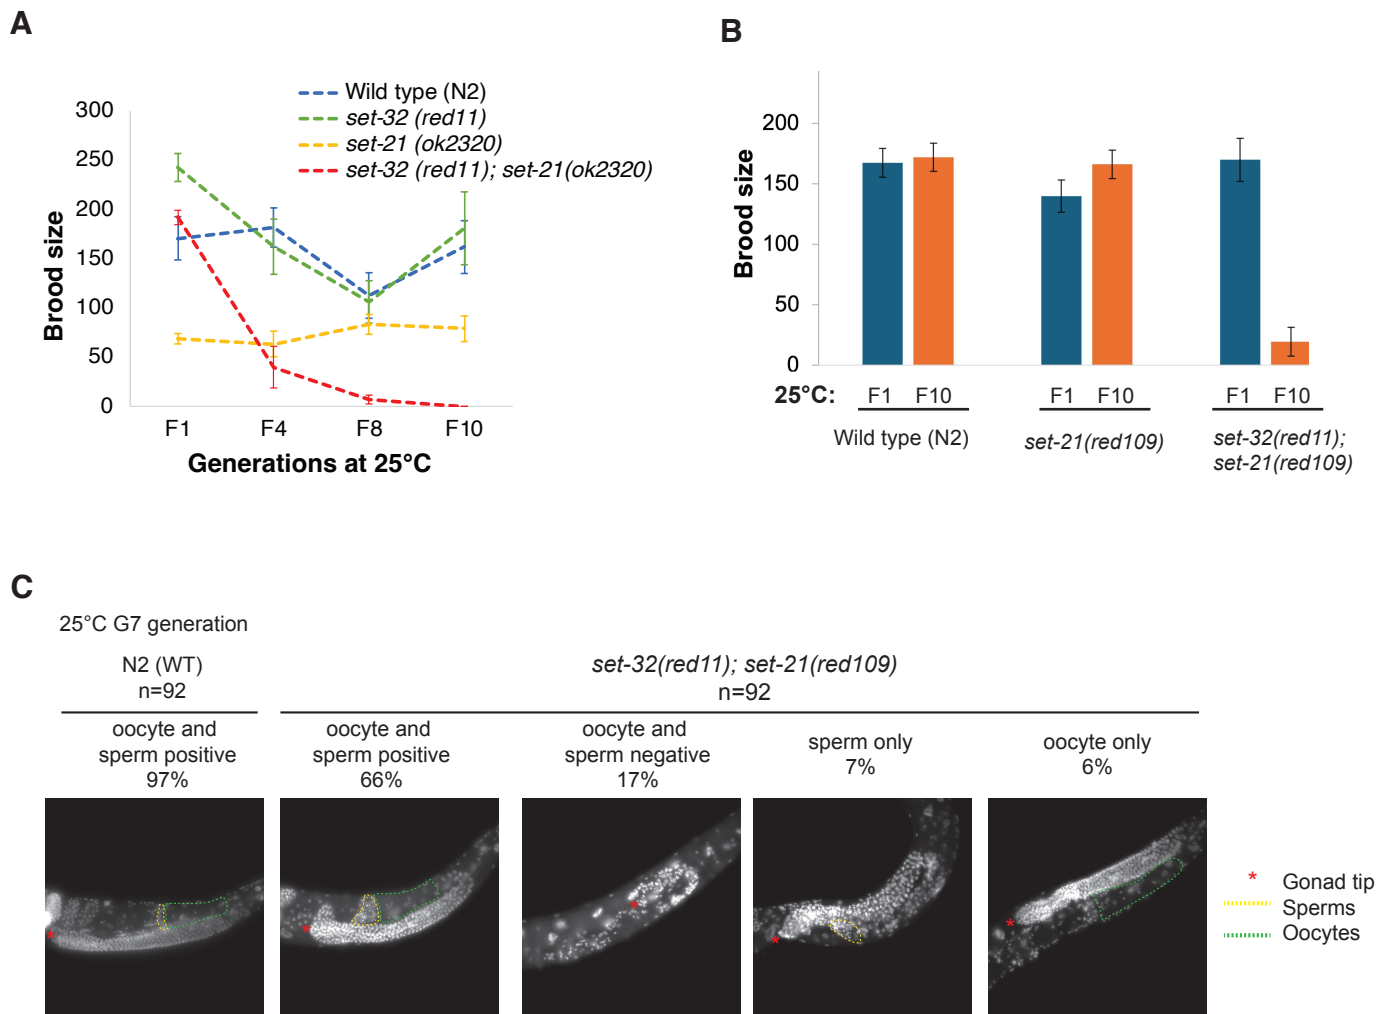

Figure S4

H3K23me1

H3K23me2

H3K23me3

coverage (WT and set-21)

coverage (WT and set-32)

coverage (WT and set-32;set-21)

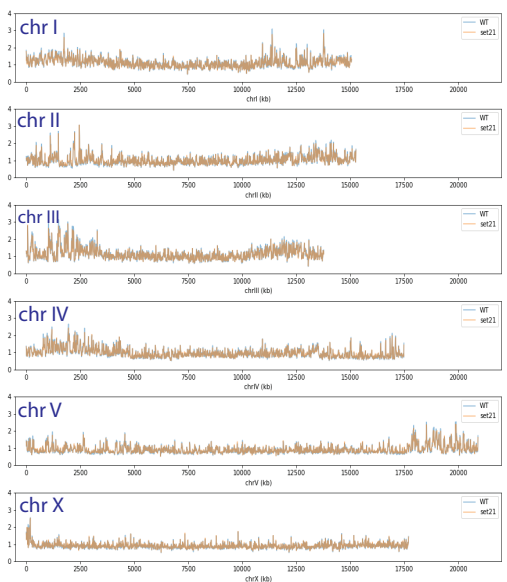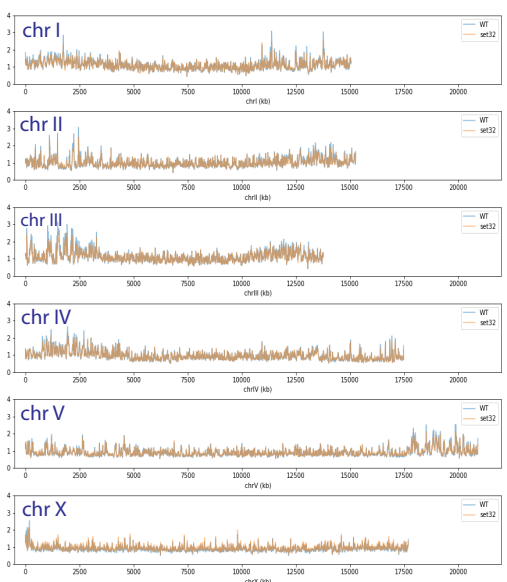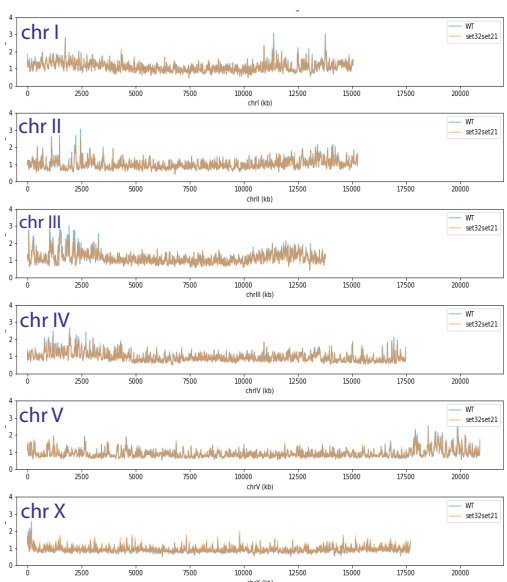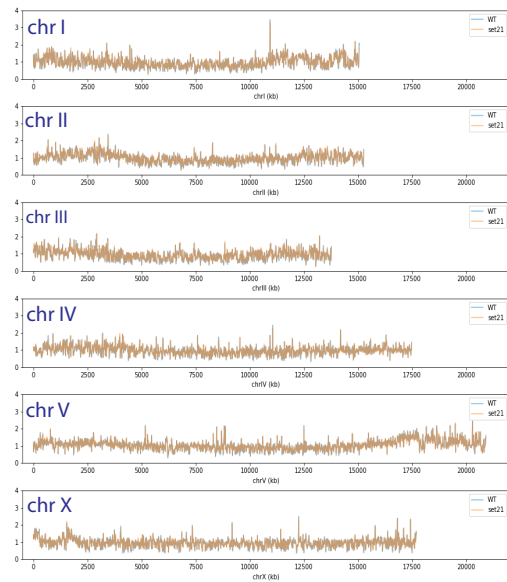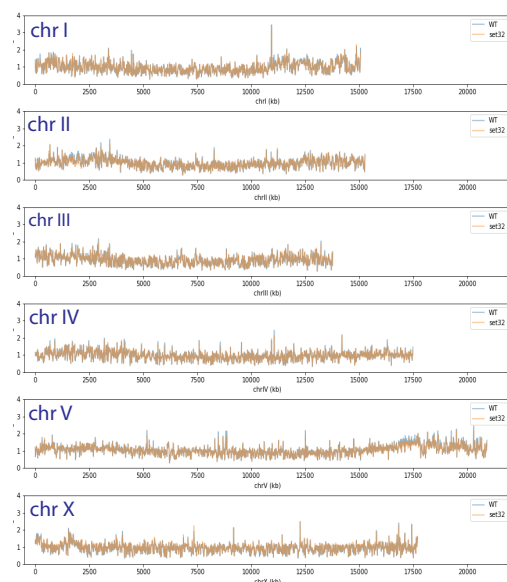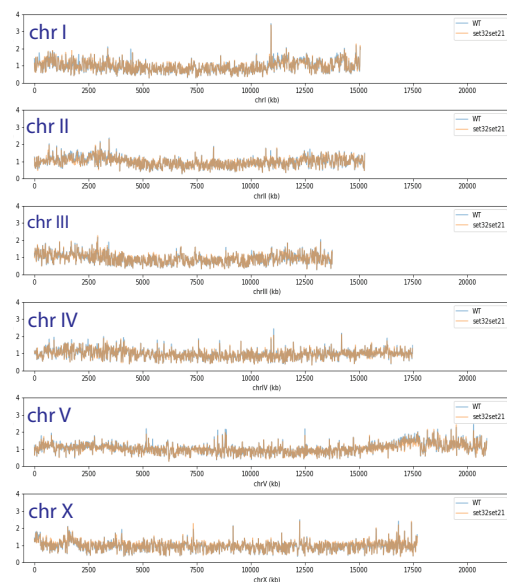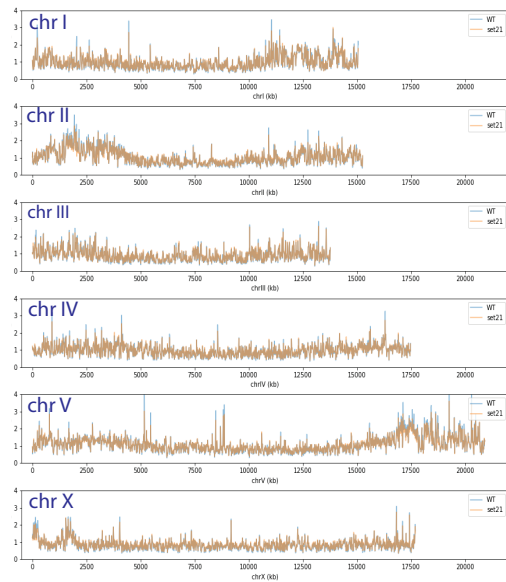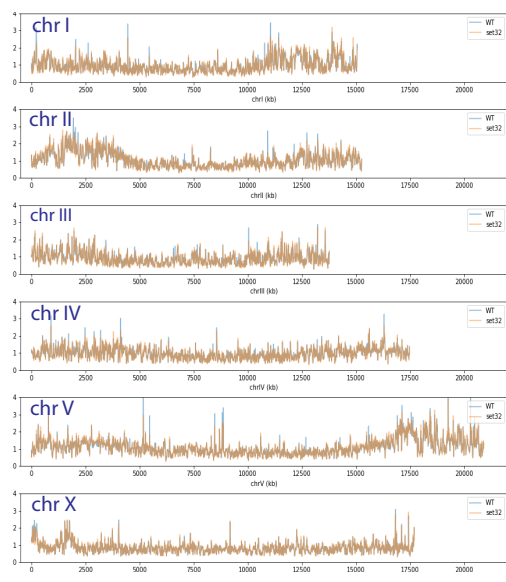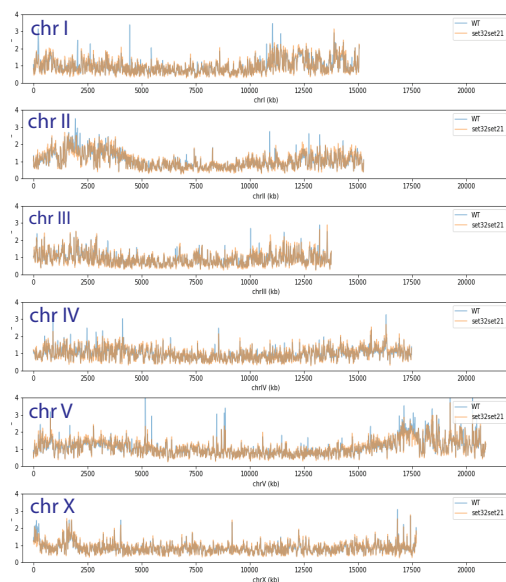

Figure S5

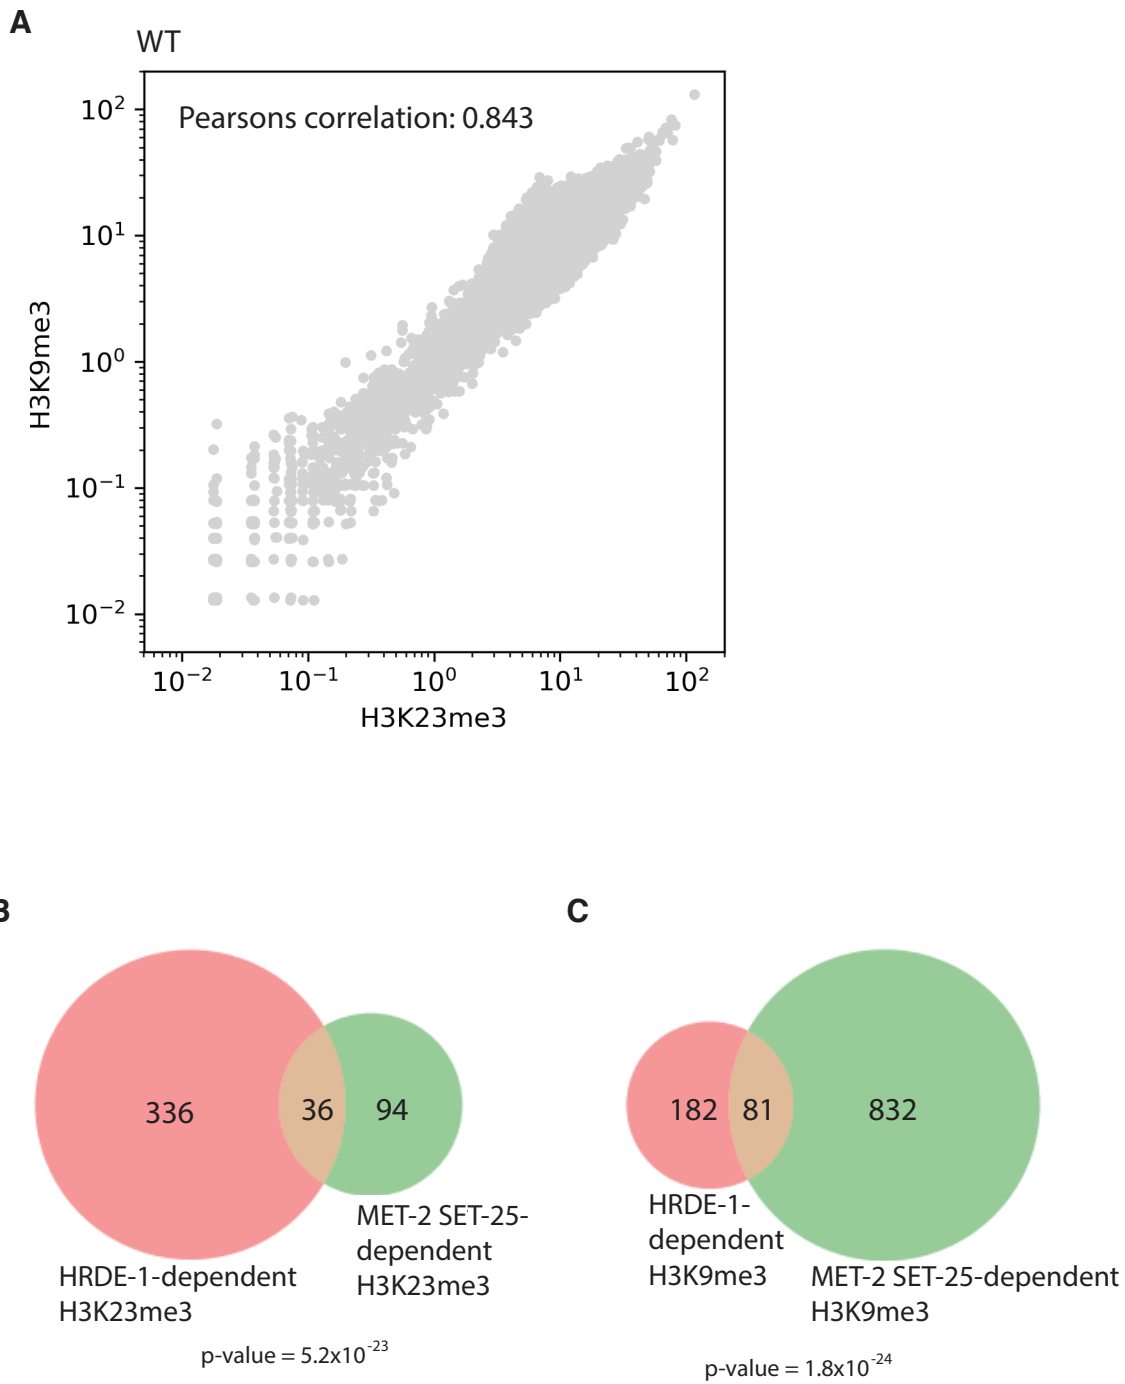



Figure S6

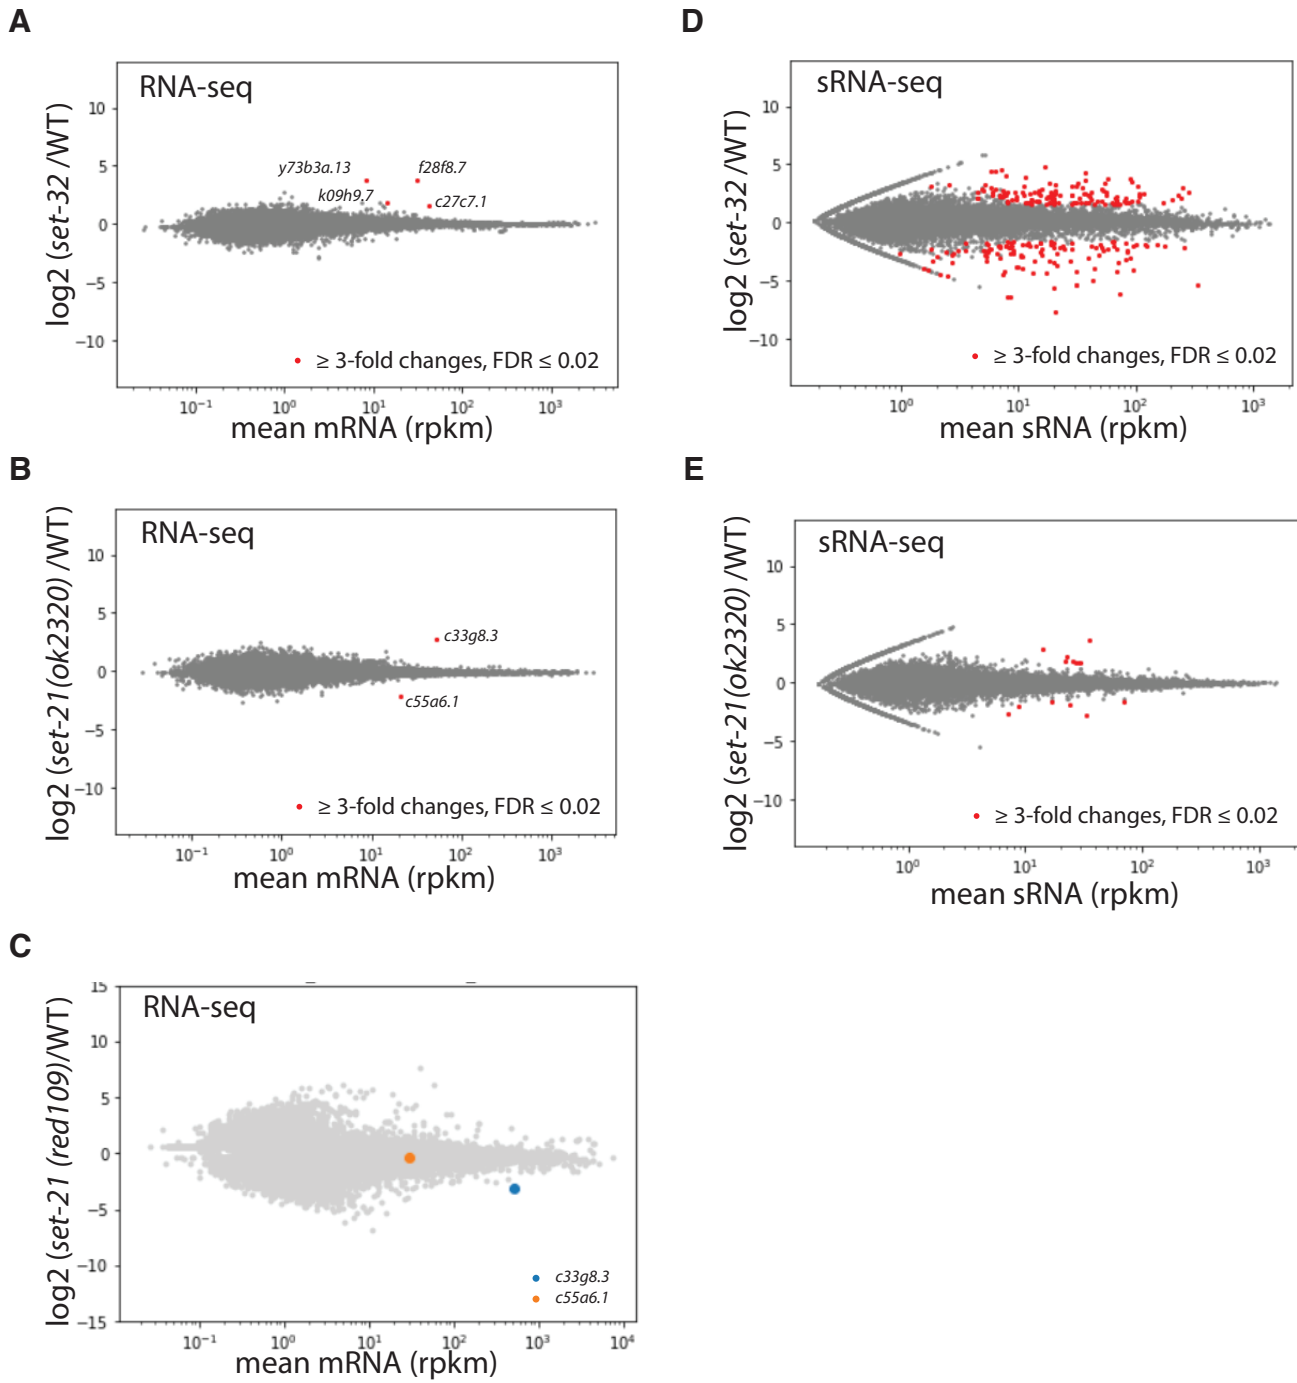

Figure S7

**A**

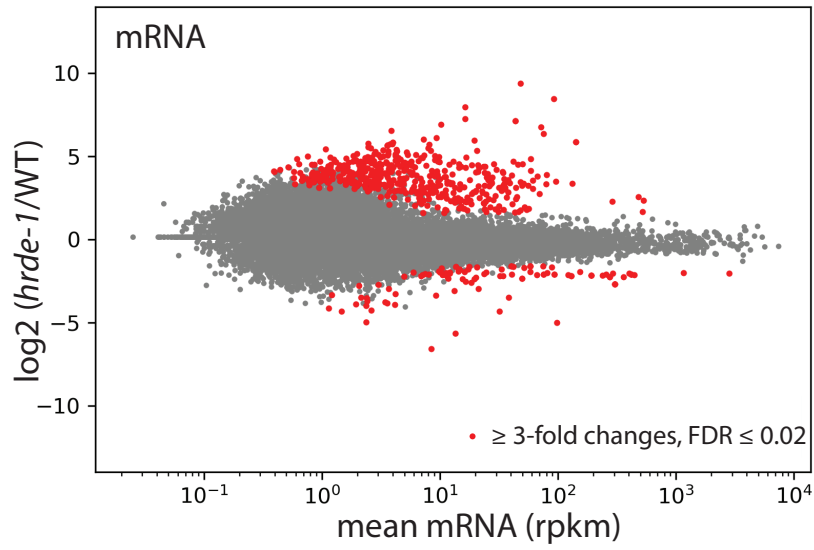

**B**

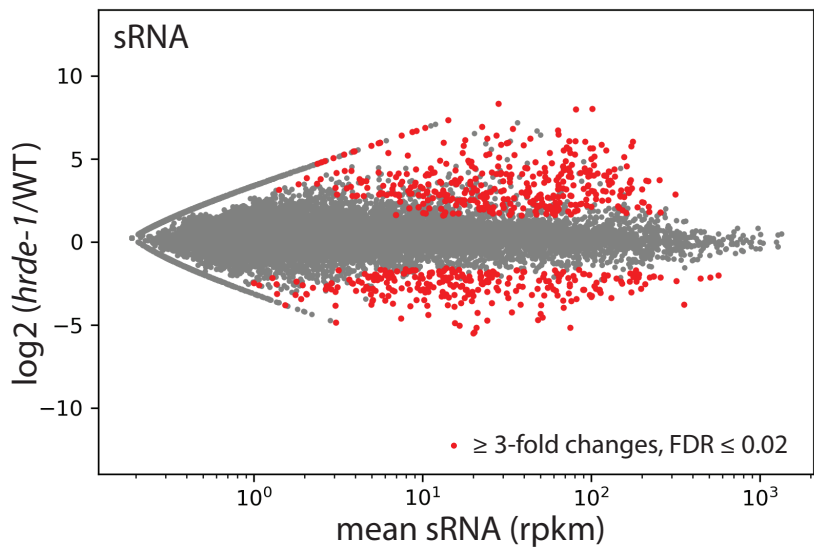

Figure S8

**A** siRNA reduced genes

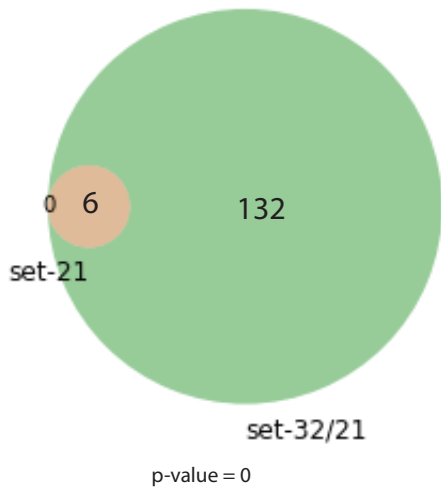

**B** siRNA increased genes

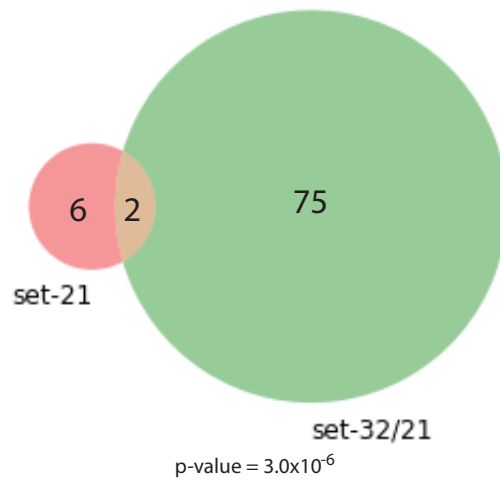

**C** siRNA reduced genes

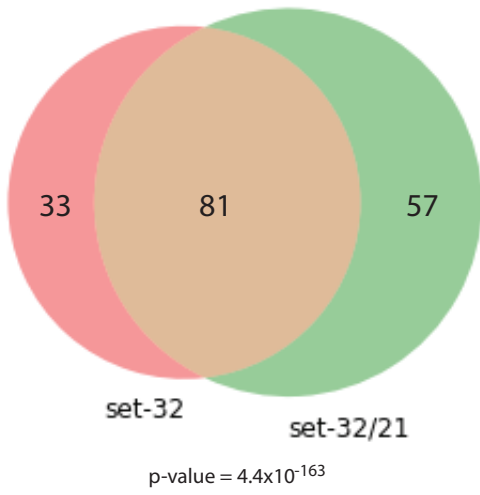

**D** siRNA increased genes

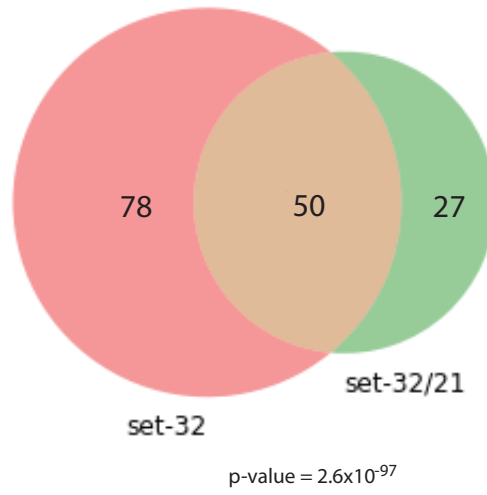

Figure S9

**A**

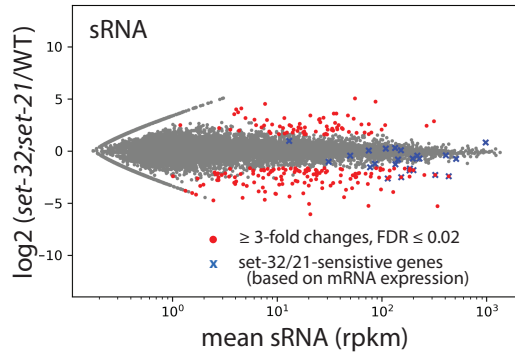

**B**

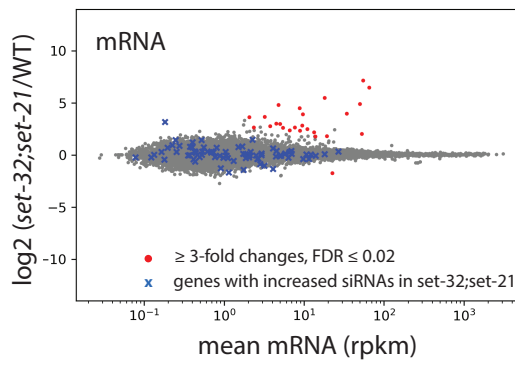

**C**

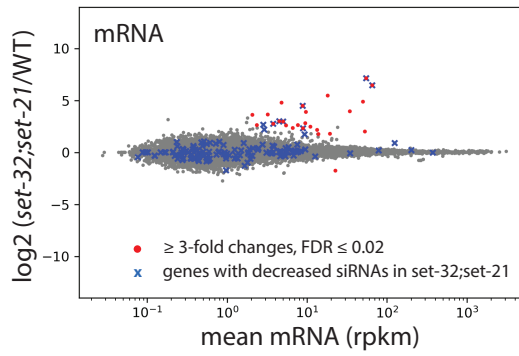

Figure S10

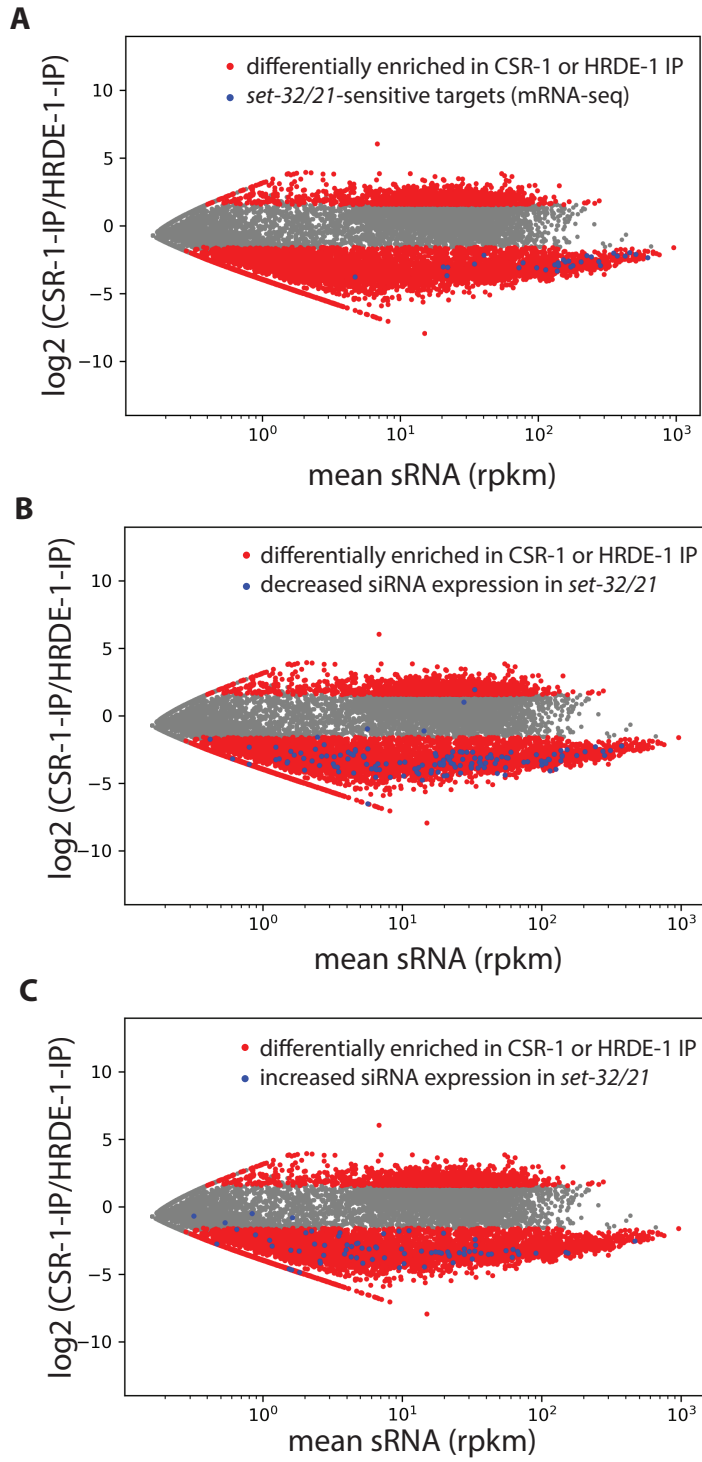

Supplement: NIHPP2024.11.05.622152v2-supplement-4.pdf [file NIHPP2024.11.05.622152v2-supplement-4.pdf]
